# Supplementary material for: Synergistic effect of KI on the corrosion inhibition of a poly(diallylammonium chloride)-based cyclocopolymer containing bis-cationic motifs for mild steel corrosion in 20% formic acid
Source: Royal Society of Chemistry journal article supplement (doi:10.1039/d3ra08959b), 2024-01-01
Supplement: d3ra08959b1.pdf [file d3ra08959b1.pdf]

**Synergistic effect of KI on the corrosion inhibition of a poly(diallylammonium chloride)-  
based cyclocopolymer containing bis-cationic motifs for mild steel corrosion in 20% formic  
acid**

Lipiar K. M. O. Goni<sup>a</sup>, Ibrahim Y. Yaagoob<sup>a</sup>, Mohammad A. J. Mazumder<sup>a,b\*</sup>, Shaikh A. Ali<sup>a,b\*</sup>

<sup>a</sup>Chemistry Department, King Fahd University of Petroleum & Minerals, Dhahran 31261, Saudi Arabia

<sup>b</sup>Interdisciplinary Research Center for Advanced Materials, King Fahd University of Petroleum & Minerals, Dhahran 31261, Saudi Arabia.

\*Corresponding author

E-mail address: [jafar@kfupm.edu.sa](mailto:jafar@kfupm.edu.sa) (MAJM)  
Tel.: (966) 13 860 7836;  
Fax: (966) 13 860 4277

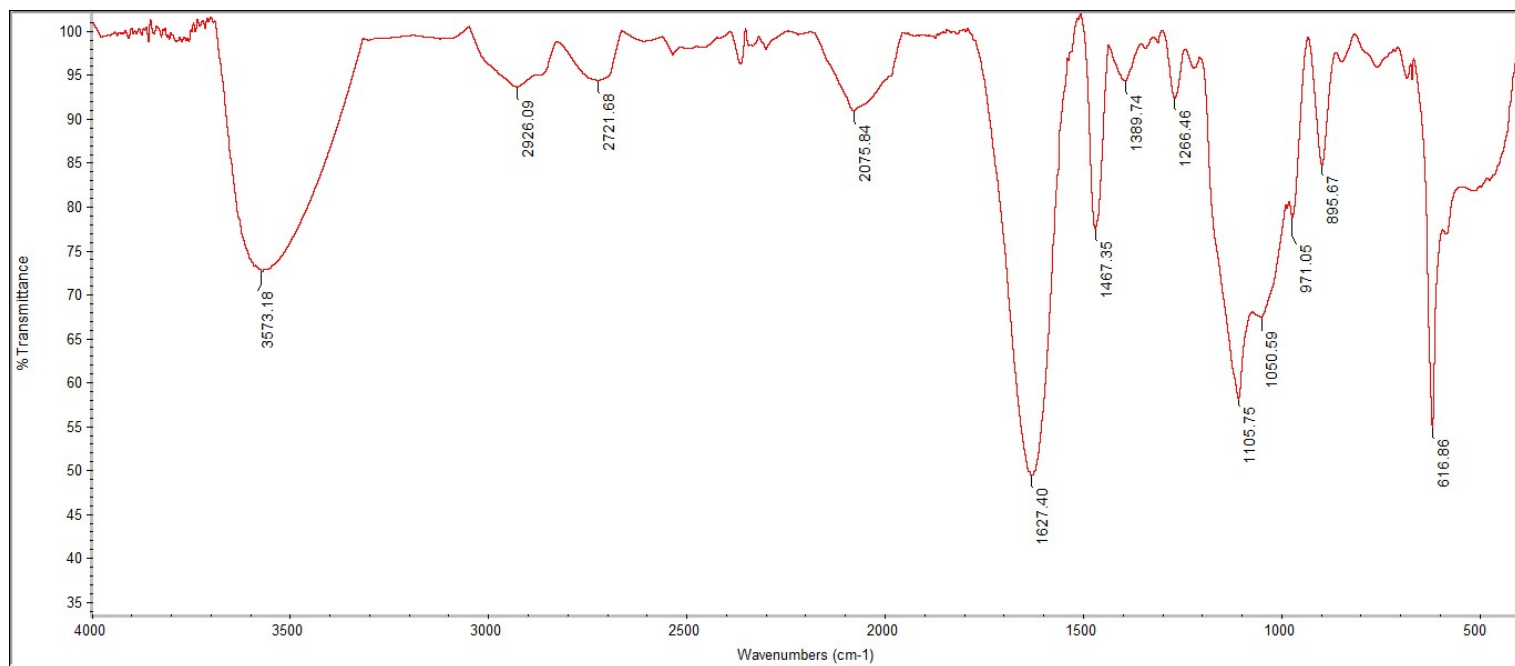

**Fig. S1** FT-IR spectrum of homopolymer **3**.

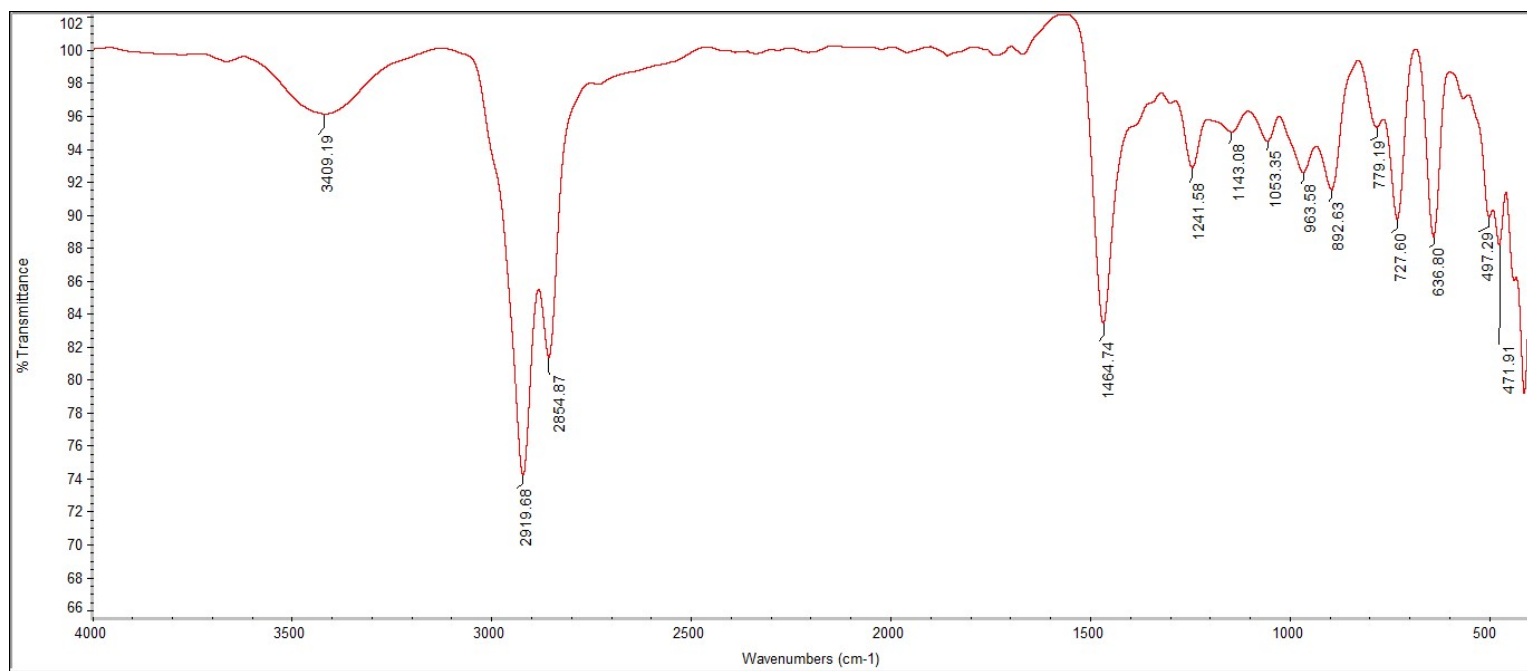

**Fig. S2** FT-IR spectrum of quaternary ammonium bromide **6**.

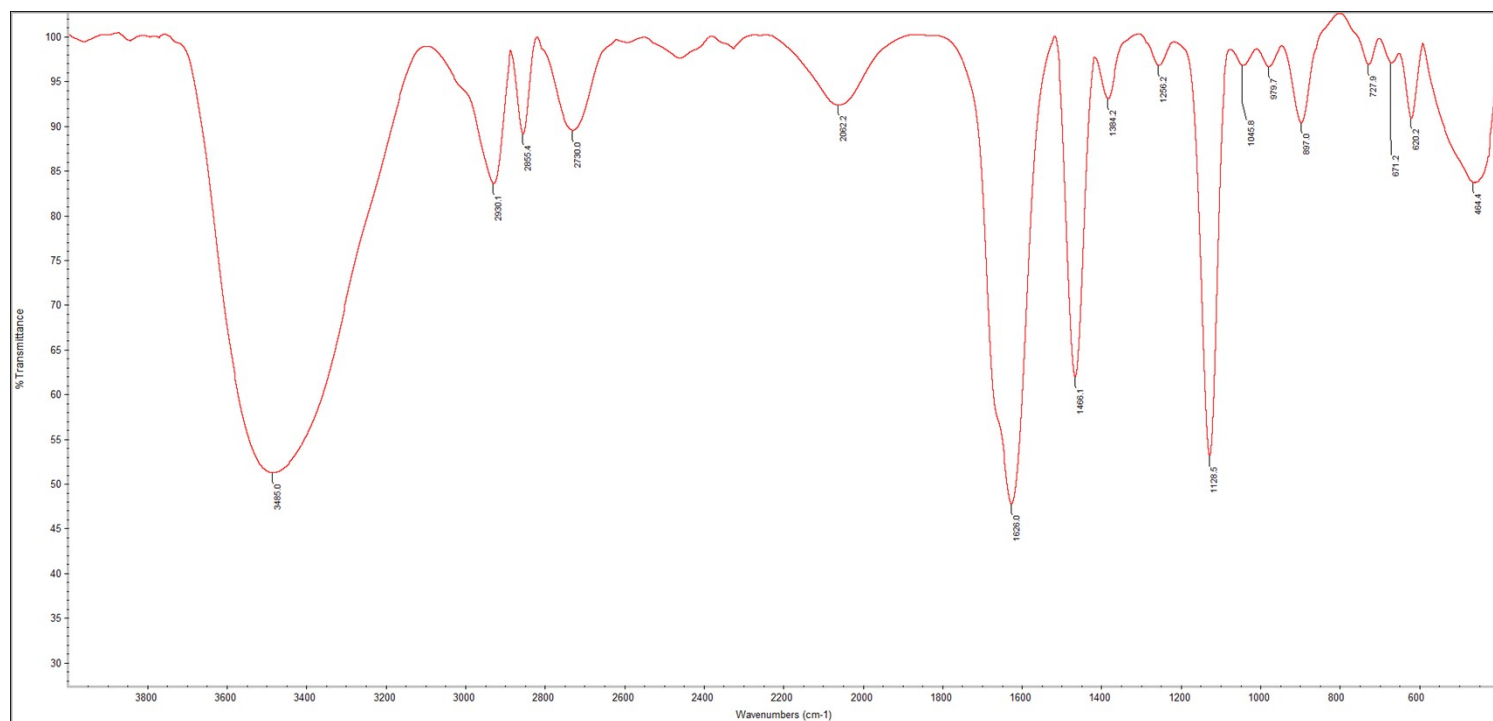

**Fig. S3** FT-IR spectrum of Hydrophobic/Hydrophilically modified poly(diallylammonium chloride) copolymer **8a**.

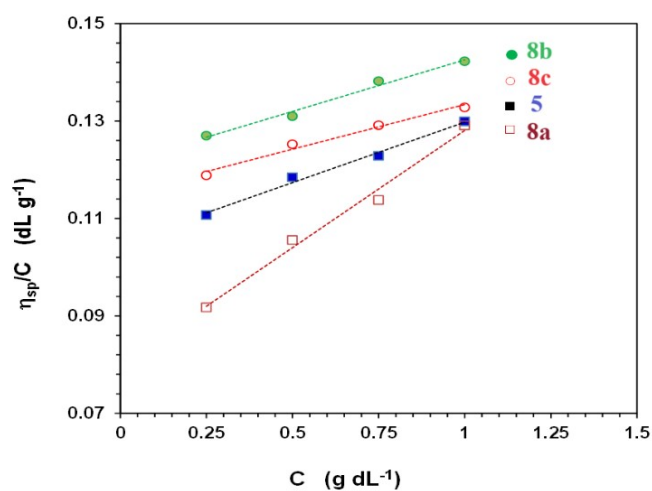

**Fig. S4** The viscosity plots of homopolymer **3** and copolymers **8a-c** in 0.1 M NaCl at 30±0.1 °C.

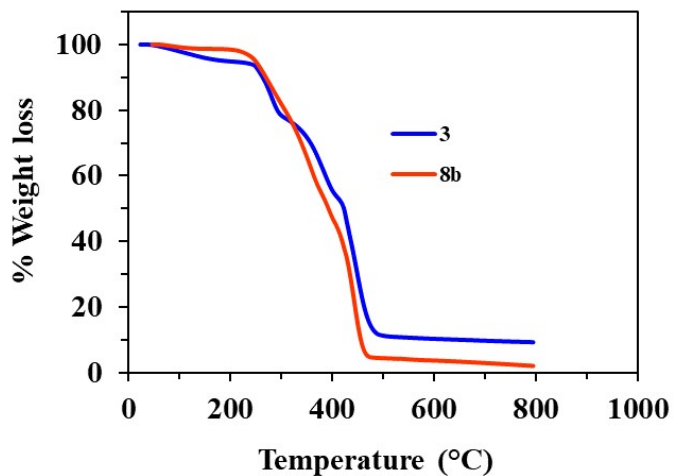

Fig. S5 TGA curves of the homopolymer (3) and copolymer 8b.

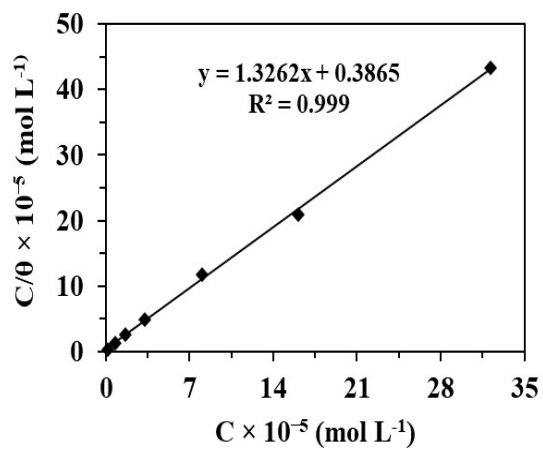

Fig. S6 Langmuir adsorption isotherm for the adsorption of 8b onto mild steel surface in 20% formic acid.

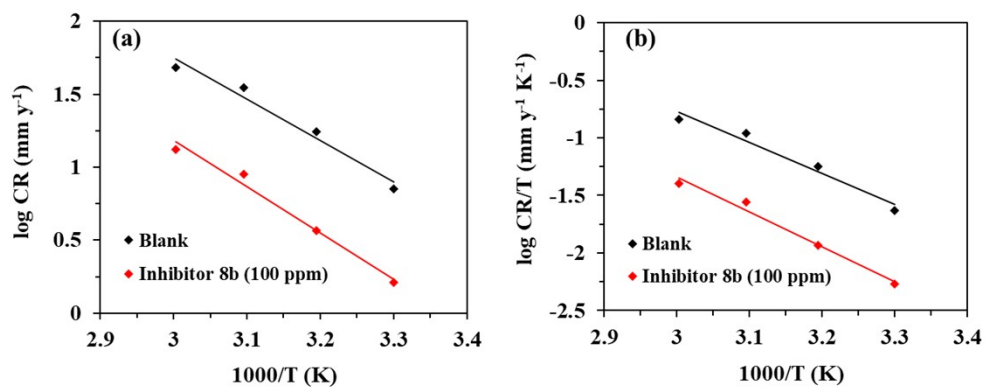

Fig. S7 (a) Arrhenius and (b) transition state plots obtained for the corrosion of mild steel.

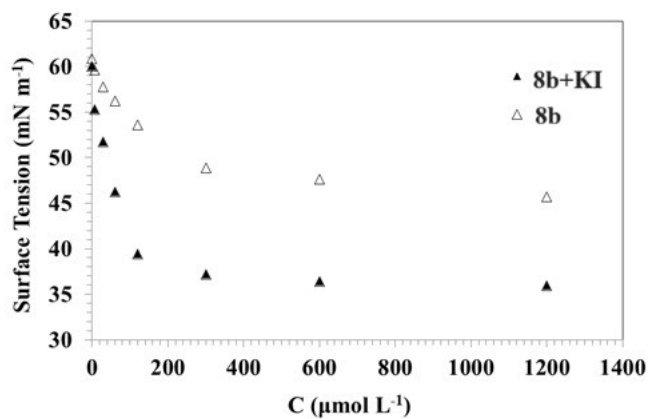

Fig. S8 Surface tension vs. concentration curves for **8b** with and without KI.
